# Supplementary material
Source: Springer Nature journal article supplement (https://www.springermedizin.de/resource/supplementary/12891_2009_727_MOESM1_ESM.pdf/9506274)
Supplement: MOESM1 [file 9506274]

Eligibility screening and recruitment

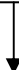

Baseline assessment

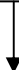

Concealed random allocation

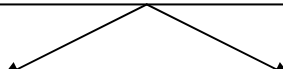

EDUCATIONAL BOOKLET +  
COMPREHENSIVE EXERCISE  
PROGRAM

EDUCATIONAL BOOKLET +  
ADVICE

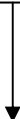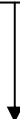

Blinded assessment 14 weeks, 6 months and 12 months
